# Supplementary material for: Insulin-Like Growth Factor-2 Is Induced Following 5-Aminolevulinic Acid-Mediated Photodynamic Therapy in SW620 Human Colon Cancer Cell Line
Source: Int J Mol Sci. 2015 Oct 2;16(10):23615–29. doi: 10.3390/ijms161023615 (PMC4632717; doi:10.3390/ijms161023615)
Supplement: Supplementary file 1 [file ijms-16-23615-s001.pdf]

## Supplementary Information

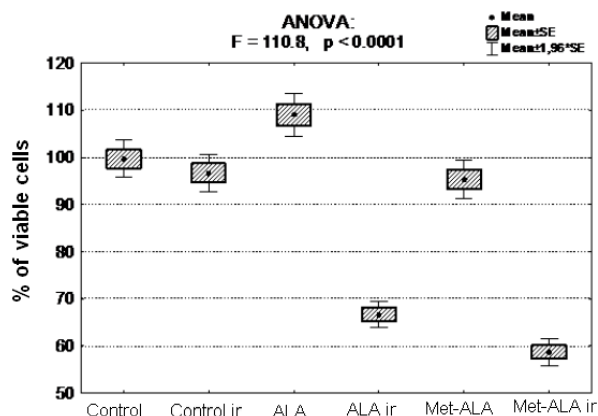

**Figure S1.** Percent of viable cells determined by MTT assay. All values are presented using multiple comparisons ANOVA test. Paired samples were compared using the Tukey HSD *post-hoc* test (Table S1)  $p < 0.05$  was considered statistically significant. Photodynamic therapy by means of 5-ALA or its methyl ester (Met-ALA) decreased the viability of SW620 cells. Cells were treated with equal concentration of above precursors for 4 h (5-ALA, Met-ALA) and then irradiated with  $4.5 \text{ J/cm}^2$  at  $630 \pm 20 \text{ nm}$  (ir, irradiation). Cell viability was measured after 24 h following the irradiation.

**Table S1.** Tukey HSD *post-hoc* test of MTT assay.

| Probes         | {1}<br>$M = 100$ | {2}<br>$M = 97$ | {3}<br>$M = 109$ | {4}<br>$M = 67$ | {5}<br>$M = 95$ | {6}<br>$M = 59$ |
|----------------|------------------|-----------------|------------------|-----------------|-----------------|-----------------|
| {1} Control    |                  | $p = 0.868$     | $p = 0.043$      | $p < 0.001$     | $p = 0.611$     | $p < 0.001$     |
| {2} Control ir | $p = 0.868$      |                 | $p = 0.007$      | $p < 0.001$     | $p = 0.996$     | $p < 0.001$     |
| {3} ALA        | $p = 0.043$      | $p = 0.007$     |                  | $p < 0.001$     | $p = 0.003$     | $p < 0.001$     |
| {4} ALA ir     | $p < 0.001$      | $p < 0.001$     | $p < 0.001$      |                 | $p < 0.001$     | $p = 0.096$     |
| {5} Met-ALA    | $p = 0.611$      | $p = 0.996$     | $p = 0.003$      | $p < 0.001$     |                 | $p < 0.001$     |
| {6} Met-ALA ir | $p < 0.001$      | $p < 0.001$     | $p < 0.001$      | $p = 0.096$     | $p < 0.001$     |                 |

M, mean; **marked** differences are significant at  $p < 0.05$ .

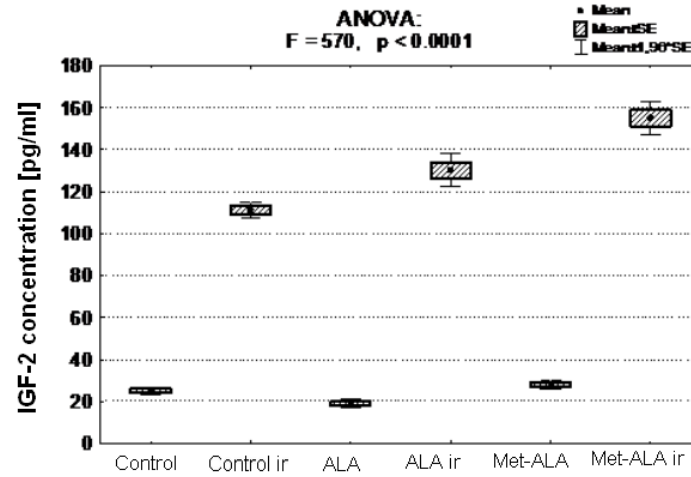

**Figure S2.** Results from ELISA test performed on SW620 human colon cancer cells exposed to 3 mM 5-ALA or met-ALA and 4.5 J/cm<sup>2</sup> light or left without a light treatment, and in control cells (no precursor, no light) or light only. A significant increase in IGF-2 concentration was found after PDT and light only ( $p < 0.05$ ). Statistical analysis were preformed using multiple comparisons ANOVA test. Paired samples were compared using the Tukey HSD *post-hoc* test (Table S2)  $p < 0.05$  was considered statistically significant. Data are presented as means with 5% statistical error from 2 experiments. ir, irradiation.

**Table 2.** Tukey HSD *post-hoc* test.

| Probes         | {1}<br><i>M</i> = 25 | {2}<br><i>M</i> = 111 | {3}<br><i>M</i> = 19 | {4}<br><i>M</i> = 130 | {5}<br><i>M</i> = 28 | {6}<br><i>M</i> = 155 |
|----------------|----------------------|-----------------------|----------------------|-----------------------|----------------------|-----------------------|
| {1} Control    |                      | $p < 0.001$           | $p = 0.594$          | $p < 0.001$           | $p = 0.950$          | $p < 0.001$           |
| {2} Control ir | $p < 0.001$          |                       | $p < 0.001$          | $p = 0.014$           | $p < 0.001$          | $p < 0.001$           |
| {3} ALA        | $p = 0.594$          | $p < 0.001$           |                      | $p < 0.001$           | $p = 0.257$          | $p < 0.001$           |
| {4} ALA ir     | $p < 0.001$          | $p = 0.014$           | $p < 0.001$          |                       | $p < 0.001$          | $p = 0.004$           |
| {5} Met-ALA    | $p = 0.950$          | $p < 0.001$           | $p = 0.257$          | $p < 0.001$           |                      | $p < 0.001$           |
| {6} Met-ALA ir | $p < 0.001$          | $p < 0.001$           | $p < 0.001$          | $p = 0.004$           | $p < 0.001$          |                       |

M, mean; **marked** differences are significant at  $p < 0.05$ .
